# Supplementary material for: Proteomic analysis of aged microglia: shifts in transcription, bioenergetics, and nutrient response
Source: Springer Nature journal article supplement (doi:10.1186/s12974-017-0840-7), 2017-05-03
Supplement: MOESM1 [file 12262258]

| Exp Fold Change | Exp p-value | Protein/<br>Gene<br>Symbol | Entrez Gene Name                                                |
|-----------------|-------------|----------------------------|-----------------------------------------------------------------|
| 21.553          | 2.15E-03    | CYBA                       | cytochrome b-245, alpha polypeptide                             |
| 16.640          | 2.78E-06    | VPS52                      | VPS52 GARP complex subunit                                      |
| 10.753          | 1.97E-02    | RAB8B                      | RAB8B, member RAS oncogene family                               |
| 10.022          | 2.43E-02    | SFN                        | stratifin                                                       |
| 8.433           | 8.85E-04    | PRKAR1A                    | protein kinase, cAMP-dependent, regulatory subunit type I alpha |
| 6.800           | 2.41E-04    | MOBP                       | myelin-associated oligodendrocyte basic protein                 |
| 5.956           | 2.93E-03    | IFI16                      | interferon, gamma-inducible protein 16                          |
| 5.040           | 7.65E-04    | FTH1                       | ferritin, heavy polypeptide 1                                   |
| 4.621           | 9.74E-03    | PLEC                       | plectin                                                         |
| 4.238           | 1.69E-03    | APOOL                      | apolipoprotein O-like                                           |
| 4.108           | 2.49E-03    | TOR3A                      | torsin family 3, member A                                       |
| 4.107           | 4.80E-02    | LAMP1                      | lysosomal associated membrane protein 1                         |
| 4.061           | 3.73E-02    | SRP19                      | signal recognition particle 19kDa                               |
| 3.938           | 7.52E-03    | OAS1                       | 2'-5'-oligoadenylate synthetase 1                               |
| 3.687           | 1.26E-02    | DHRS1                      | dehydrogenase/reductase (SDR family) member 1                   |
| 3.574           | 4.22E-02    | LGALS3BP                   | lectin, galactoside-binding, soluble, 3 binding protein         |
| 3.530           | 3.35E-02    | NT5C2                      | 5'-nucleotidase, cytosolic II                                   |
| 3.357           | 3.69E-02    | LY86                       | lymphocyte antigen 86                                           |
| 3.298           | 1.26E-02    | FTL                        | ferritin, light polypeptide                                     |
| 3.072           | 1.49E-02    | NOMO1 (incl                | NODAL modulator 1                                               |
| 3.051           | 1.69E-03    | ASL                        | argininosuccinate lyase                                         |
| 3.021           | 3.39E-02    | MTX2                       | metaxin 2                                                       |
| 2.997           | 3.71E-03    | USP48                      | ubiquitin specific peptidase 48                                 |
| 2.987           | 4.99E-02    | SYNGR1                     | synaptogyrin 1                                                  |
| 2.951           | 2.30E-02    | GCLM                       | glutamate-cysteine ligase, modifier subunit                     |
| 2.887           | 7.80E-04    | NDUFA7                     | NADH:ubiquinone oxidoreductase subunit A7                       |
| 2.834           | 3.43E-02    | ADSSL1                     | adenylosuccinate synthase like 1                                |
| 2.795           | 4.75E-02    | ME2                        | malic enzyme 2, NAD(+)-dependent, mitochondrial                 |
| 2.793           | 2.43E-06    | HEXB                       | hexosaminidase B (beta polypeptide)                             |
| 2.675           | 2.64E-02    | CBR4                       | carbonyl reductase 4                                            |
| 2.547           | 2.37E-03    | LSP1                       | lymphocyte-specific protein 1                                   |
| 2.529           | 7.29E-05    | HEXA                       | hexosaminidase A (alpha polypeptide)                            |
| 2.500           | 1.92E-03    | SCARB2                     | scavenger receptor class B member 2                             |
| 2.461           | 1.35E-02    | H1F0                       | H1 histone family member 0                                      |
| 2.400           | 8.96E-03    | RAB32                      | RAB32, member RAS oncogene family                               |
| 2.388           | 1.46E-02    | NRDC                       | nardilysin convertase                                           |
| 2.386           | 1.06E-02    | MTX1                       | metaxin 1                                                       |
| 2.363           | 3.89E-02    | ZCCHC8                     | zinc finger, CCHC domain containing 8                           |
| 2.349           | 3.29E-02    | HINT1                      | histidine triad nucleotide binding protein 1                    |
| 2.299           | 1.52E-02    | ARRB1                      | arrestin, beta 1                                                |
| 2.288           | 3.21E-02    | NDUFB3                     | NADH:ubiquinone oxidoreductase subunit B3                       |
| 2.262           | 3.49E-02    | ACOT9                      | acyl-CoA thioesterase 9                                         |
| 2.227           | 3.18E-02    | CREB1                      | cAMP responsive element binding protein 1                       |
| 2.169           | 3.75E-02    | B2M                        | beta-2-microglobulin                                            |
| 2.164           | 2.62E-02    | ACP2                       | acid phosphatase 2, lysosomal                                   |
| 2.156           | 4.51E-02    | APOE                       | apolipoprotein E                                                |
| 2.070           | 2.83E-03    | CTSZ                       | cathepsin Z                                                     |
| 2.054           | 2.26E-02    | Rpl36a                     | ribosomal protein L36A                                          |

|       |          |          |                                                 |
|-------|----------|----------|-------------------------------------------------|
| 2.050 | 2.98E-02 | CD47     | CD47 molecule                                   |
| 2.006 | 1.75E-02 | ARL8A    | ADP ribosylation factor like GTPase 8A          |
| 2.004 | 3.42E-02 | ATPIF1   | ATPase inhibitory factor 1                      |
| 2.003 | 3.20E-03 | GLTP     | glycolipid transfer protein                     |
| 1.917 | 7.86E-03 | CORO1C   | coronin 1C                                      |
| 1.898 | 4.04E-03 | TCIRG1   | T-cell, immune regulator 1, ATPase, H+          |
| 1.893 | 3.10E-02 | TMA7     | transporting, lysosomal V0 subunit A3           |
| 1.883 | 3.10E-02 | TMA7     | translation machinery associated 7 homolog      |
| 1.883 | 4.03E-02 | WDR5     | WD repeat domain 5                              |
| 1.870 | 1.41E-02 | CYB5R1   | cytochrome b5 reductase 1                       |
| 1.862 | 9.95E-03 | IFI16    | interferon, gamma-inducible protein 16          |
| 1.840 | 2.18E-02 | HLA-A    | major histocompatibility complex, class I, A    |
| 1.834 | 7.92E-03 | SH3GLB1  | SH3-domain GRB2-like endophilin B1              |
| 1.821 | 3.33E-02 | FCER1G   | Fc fragment of IgE receptor Ig                  |
| 1.817 | 3.84E-02 | TIAL1    | TIA1 cytotoxic granule-associated RNA           |
| 1.765 | 1.69E-02 | Dync1i2  | binding protein-like 1                          |
| 1.757 | 7.79E-04 | ECHS1    | dynein cytoplasmic 1 intermediate chain 2       |
| 1.713 | 8.59E-04 | PHB      | enoyl-CoA hydratase, short chain, 1,            |
| 1.710 | 4.94E-02 | GPS1     | mitochondrial                                   |
| 1.687 | 2.63E-03 | ANXA5    | prohibitin                                      |
| 1.678 | 9.14E-03 | CAPG     | G protein pathway suppressor 1                  |
| 1.672 | 6.31E-05 | SAR1A    | annexin A5                                      |
| 1.664 | 2.26E-02 | MYO1E    | capping protein (actin filament), gelsolin-like |
| 1.640 | 2.27E-04 | GSTO1    | secretion associated, Ras related GTPase 1A     |
| 1.637 | 4.05E-02 | TRA2A    | myosin IE                                       |
| 1.608 | 1.04E-03 | RPS14    | glutathione S-transferase omega 1               |
| 1.601 | 1.53E-03 | LAMP2    | transformer 2 alpha homolog (Drosophila)        |
| 1.564 | 2.52E-03 | INPP5D   | ribosomal protein S14                           |
| 1.554 | 2.46E-02 | HSD17B11 | lysosomal associated membrane protein 2         |
| 1.549 | 3.45E-03 | PHB2     | inositol polyphosphate-5-phosphatase D          |
| 1.547 | 1.36E-03 | NPC1     | hydroxysteroid (17-beta) dehydrogenase 11       |
| 1.529 | 6.97E-03 | AIF1     | prohibitin 2                                    |
| 1.525 | 4.62E-03 | ATP6V0D1 | Niemann-Pick disease, type C1                   |
| 1.525 | 2.77E-02 | SPCS3    | allograft inflammatory factor 1                 |
| 1.521 | 1.66E-03 | ACOT13   | ATPase, H+ transporting, lysosomal 38kDa,       |
| 1.512 | 2.67E-02 | TAPBP    | V0 subunit d1                                   |
| 1.508 | 2.28E-02 | ACOX3    | signal peptidase complex subunit 3              |
| 1.505 | 3.49E-05 | GATM     | acyl-CoA thioesterase 13                        |
| 1.504 | 1.66E-03 | ARL8B    | acyl-CoA oxidase 3, pristanoyl                  |
| 1.481 | 7.06E-04 | HK2      | glycine amidinotransferase                      |
| 1.479 | 9.48E-04 | STX7     | ADP ribosylation factor like GTPase 8B          |
| 1.473 | 2.20E-03 | LGALS9B  | hexokinase 2                                    |
| 1.468 | 1.76E-02 | ATL3     | syntaxin 7                                      |
| 1.462 | 3.69E-03 | HMGCL    | lectin, galactoside-binding, soluble, 9B        |
| 1.457 | 2.89E-02 | CD180    | atlastin GTPase 3                               |
| 1.455 | 5.36E-03 | ACADS    | 3-hydroxymethyl-3-methylglutaryl-CoA lyase      |
| 1.452 | 5.62E-03 | PTPRC    | CD180 molecule                                  |
| 1.448 | 2.03E-02 | APOA1BP  | acyl-CoA dehydrogenase, C-2 to C-3 short        |
| 1.447 | 4.94E-02 | COX7A2   | chain                                           |
| 1.443 | 3.45E-02 | MYO1F    | protein tyrosine phosphatase, receptor type C   |
|       |          |          | apolipoprotein A-I binding protein              |
|       |          |          | cytochrome c oxidase subunit VIIa polypeptide   |
|       |          |          | 2 (liver)                                       |
|       |          |          | myosin IF                                       |

|       |          |          |                                                                                                                 |
|-------|----------|----------|-----------------------------------------------------------------------------------------------------------------|
| 1.437 | 1.90E-03 | HADHB    | hydroxyacyl-CoA dehydrogenase/3-ketoacyl-CoA thiolase/enoyl-CoA hydratase (trifunctional protein), beta subunit |
| 1.430 | 2.54E-02 | ANXA4    | annexin A4                                                                                                      |
| 1.429 | 1.99E-03 | SRI      | sorcin                                                                                                          |
| 1.404 | 5.58E-03 | VAMP8    | vesicle associated membrane protein 8                                                                           |
| 1.399 | 1.91E-02 | OXCT1    | 3-oxoacid CoA-transferase 1                                                                                     |
| 1.398 | 6.67E-03 | COX6B1   | cytochrome c oxidase subunit VIb polypeptide 1 (ubiquitous)                                                     |
| 1.394 | 2.85E-02 | SHMT2    | serine hydroxymethyltransferase 2 (mitochondrial)                                                               |
| 1.392 | 7.56E-03 | RBM3     | RNA binding motif (RNP1, RRM) protein 3                                                                         |
| 1.389 | 1.94E-03 | NUP85    | nucleoporin 85kDa                                                                                               |
| 1.388 | 3.84E-03 | BAX      | BCL2-associated X protein                                                                                       |
| 1.382 | 9.21E-04 | PLCG2    | phospholipase C gamma 2                                                                                         |
| 1.379 | 2.03E-02 | ACTR2    | ARP2 actin-related protein 2 homolog (yeast)                                                                    |
| 1.379 | 1.18E-02 | SDHA     | succinate dehydrogenase complex subunit A, flavoprotein (Fp)                                                    |
| 1.378 | 1.02E-03 | PGD      | phosphogluconate dehydrogenase                                                                                  |
| 1.378 | 3.08E-02 | BLVRB    | biliverdin reductase B                                                                                          |
| 1.377 | 1.91E-02 | Ndufs5   | NADH dehydrogenase (ubiquinone) Fe-S protein 5                                                                  |
| 1.376 | 3.47E-02 | Cox6c    | cytochrome c oxidase subunit VIc                                                                                |
| 1.375 | 3.20E-03 | EIF3G    | eukaryotic translation initiation factor 3 subunit G                                                            |
| 1.369 | 9.18E-03 | TECR     | trans-2,3-enoyl-CoA reductase                                                                                   |
| 1.369 | 1.76E-03 | MTCH2    | mitochondrial carrier 2                                                                                         |
| 1.355 | 4.17E-02 | IVD      | isovaleryl-CoA dehydrogenase                                                                                    |
| 1.354 | 3.77E-02 | HMHA1    | histocompatibility (minor) HA-1                                                                                 |
| 1.349 | 2.03E-02 | NAMPT    | nicotinamide phosphoribosyltransferase                                                                          |
| 1.349 | 1.19E-02 | COTL1    | coactosin-like F-actin binding protein 1                                                                        |
| 1.344 | 8.24E-05 | ARPC2    | actin related protein 2/3 complex subunit 2                                                                     |
| 1.338 | 9.25E-03 | PAK2     | p21 protein (Cdc42/Rac)-activated kinase 2                                                                      |
| 1.337 | 8.78E-05 | GANAB    | glucosidase, alpha; neutral AB                                                                                  |
| 1.326 | 2.79E-02 | GOT1     | glutamic-oxaloacetic transaminase 1, soluble                                                                    |
| 1.323 | 7.46E-03 | EIF3D    | eukaryotic translation initiation factor 3 subunit D                                                            |
| 1.321 | 2.87E-02 | ARPC5    | actin related protein 2/3 complex subunit 5                                                                     |
| 1.317 | 4.39E-02 | RPS6KA1  | ribosomal protein S6 kinase, 90kDa, polypeptide 1                                                               |
| 1.312 | 5.83E-03 | ATP6V1A  | ATPase, H <sup>+</sup> transporting, lysosomal 70kDa, V1 subunit A                                              |
| 1.310 | 5.77E-04 | SLC25A11 | solute carrier family 25 (mitochondrial carrier; oxoglutarate carrier), member 11                               |
| 1.302 | 3.59E-02 | ATP6V1C1 | ATPase, H <sup>+</sup> transporting, lysosomal 42kDa, V1 subunit C1                                             |
| 1.301 | 6.73E-03 | PLD4     | phospholipase D family member 4                                                                                 |
| 1.297 | 2.52E-02 | DBNL     | drebrin-like                                                                                                    |
| 1.291 | 7.25E-03 | RAB2A    | RAB2A, member RAS oncogene family                                                                               |
| 1.286 | 2.94E-03 | TLN1     | talin 1                                                                                                         |
| 1.285 | 1.06E-03 | GLUD1    | glutamate dehydrogenase 1                                                                                       |
| 1.281 | 3.26E-02 | CCT7     | chaperonin containing TCP1 subunit 7                                                                            |
| 1.281 | 2.42E-02 | AKR1A1   | aldo-keto reductase family 1, member A1 (aldehyde reductase)                                                    |
| 1.277 | 2.59E-02 | LIPA     | lipase A, lysosomal acid, cholesterol esterase                                                                  |
| 1.277 | 3.56E-02 | CTSB     | cathepsin B                                                                                                     |

|        |          |          |                                                                                                                  |
|--------|----------|----------|------------------------------------------------------------------------------------------------------------------|
| 1.275  | 9.09E-03 | PRDX1    | peroxiredoxin 1                                                                                                  |
| 1.274  | 1.85E-03 | UAP1L1   | UDP-N-acetylglucosamine pyrophosphorylase 1 like 1                                                               |
| 1.273  | 4.58E-04 | CAPZB    | capping protein (actin filament) muscle Z-line, beta                                                             |
| 1.271  | 2.39E-02 | ATP5F1   | ATP synthase, H+ transporting, mitochondrial Fo complex subunit B1                                               |
| 1.268  | 8.27E-03 | HADHA    | hydroxyacyl-CoA dehydrogenase/3-ketoacyl-CoA thiolase/enoyl-CoA hydratase (trifunctional protein), alpha subunit |
| 1.264  | 1.35E-03 | PAFAH1B1 | platelet activating factor acetylhydrolase 1b regulatory subunit 1                                               |
| 1.262  | 5.09E-04 | DYNC1H1  | dynein, cytoplasmic 1, heavy chain 1                                                                             |
| 1.261  | 4.97E-02 | CAT      | catalase                                                                                                         |
| 1.260  | 2.90E-02 | OGDH     | oxoglutarate (alpha-ketoglutarate) dehydrogenase (lipoamide)                                                     |
| 1.254  | 3.62E-02 | ARL6IP5  | ADP ribosylation factor like GTPase 6 interacting protein 5                                                      |
| 1.253  | 3.48E-02 | MYL6     | myosin light chain 6                                                                                             |
| 1.253  | 5.00E-02 | YWHAH    | tyrosine 3-monooxygenase/tryptophan 5-monooxygenase activation protein, eta                                      |
| 1.252  | 2.31E-02 | CORO1A   | coronin 1A                                                                                                       |
| 1.250  | 1.82E-02 | VARS     | valyl-tRNA synthetase                                                                                            |
| 1.249  | 1.62E-02 | VPS35    | VPS35 retromer complex component                                                                                 |
| 1.246  | 7.61E-04 | MYH9     | myosin, heavy chain 9, non-muscle                                                                                |
| 1.234  | 3.29E-02 | SOD2     | superoxide dismutase 2, mitochondrial                                                                            |
| 1.227  | 4.40E-02 | ACTR1A   | ARP1 actin-related protein 1 homolog A, contractin alpha (yeast)                                                 |
| 1.225  | 1.13E-02 | VWA5A    | von Willebrand factor A domain containing 5A                                                                     |
| 1.215  | 2.04E-02 | PITPNA   | phosphatidylinositol transfer protein alpha                                                                      |
| 1.210  | 4.15E-02 | ANXA6    | annexin A6                                                                                                       |
| 1.210  | 1.58E-02 | PPIB     | peptidylprolyl isomerase B                                                                                       |
| 1.209  | 3.19E-02 | LCP1     | lymphocyte cytosolic protein 1 (L-plastin)                                                                       |
| 1.198  | 4.59E-02 | PA2G4    | proliferation-associated 2G4 eukaryotic translation initiation factor 3 subunit E                                |
| 1.195  | 1.80E-02 | EIF3E    | E                                                                                                                |
| 1.193  | 4.28E-02 | COX4I1   | cytochrome c oxidase subunit IV isoform 1                                                                        |
| 1.186  | 4.47E-02 | HSD17B10 | hydroxysteroid (17-beta) dehydrogenase 10                                                                        |
| 1.186  | 4.39E-02 | ARPC3    | actin related protein 2/3 complex subunit 3                                                                      |
| 1.184  | 2.54E-02 | ATP5D    | ATP synthase, H+ transporting, mitochondrial F1 complex, delta subunit                                           |
| 1.179  | 2.21E-02 | VDAC1    | voltage dependent anion channel 1                                                                                |
| 1.176  | 1.56E-02 | CPNE3    | copine III                                                                                                       |
| 1.172  | 4.73E-02 | TAGLN2   | transgelin 2                                                                                                     |
| 1.171  | 2.70E-02 | Rrbp1    | ribosome binding protein 1                                                                                       |
| 1.157  | 2.06E-02 | CAP1     | CAP, adenylate cyclase-associated protein 1 (yeast)                                                              |
| 1.135  | 3.90E-02 | DDOST    | dolichyl-diphosphooligosaccharide--protein glycosyltransferase subunit (non-catalytic)                           |
| 1.133  | 3.23E-02 | UQCRC1   | ubiquinol-cytochrome c reductase core protein I                                                                  |
| 1.101  | 3.03E-02 | UQCRC2   | ubiquinol-cytochrome c reductase core protein II                                                                 |
| 1.097  | 2.73E-02 | RPN2     | ribophorin II                                                                                                    |
| -1.086 | 2.00E-02 | PSMA6    | proteasome subunit alpha 6                                                                                       |
| -1.150 | 3.60E-02 | SNX12    | sorting nexin 12                                                                                                 |

|        |          |          |                                                                                                                           |
|--------|----------|----------|---------------------------------------------------------------------------------------------------------------------------|
| -1.177 | 2.68E-02 | NONO     | non-POU domain containing, octamer-binding                                                                                |
| -1.213 | 3.16E-02 | NUTF2    | nuclear transport factor 2                                                                                                |
| -1.218 | 4.69E-02 | DDB1     | damage-specific DNA binding protein 1                                                                                     |
| -1.223 | 8.14E-03 | Anp32b   | acidic (leucine-rich) nuclear phosphoprotein                                                                              |
| -1.226 | 2.23E-02 | SF3B2    | 32 family, member B                                                                                                       |
| -1.226 | 3.30E-02 | SF3B2    | splicing factor 3b subunit 2                                                                                              |
| -1.226 | 3.30E-02 | RBM14    | RNA binding motif protein 14                                                                                              |
| -1.228 | 2.24E-02 | ELAVL1   | ELAV like RNA binding protein 1                                                                                           |
| -1.232 | 2.80E-03 | TRA2B    | transformer 2 beta homolog (Drosophila)                                                                                   |
| -1.234 | 1.05E-02 | HNRNPU   | heterogeneous nuclear ribonucleoprotein U<br>(scaffold attachment factor A)<br>small nuclear ribonucleoprotein, U5 200kDa |
| -1.235 | 1.70E-02 | SNRNP200 | subunit                                                                                                                   |
| -1.237 | 1.60E-02 | DDX5     | DEAD-box helicase 5                                                                                                       |
| -1.238 | 1.79E-02 | DYNLL2   | dynein, light chain, LC8-type 2                                                                                           |
| -1.238 | 2.08E-02 | TARDBP   | TAR DNA binding protein                                                                                                   |
| -1.239 | 4.72E-02 | U2AF2    | U2 small nuclear RNA auxiliary factor 2                                                                                   |
| -1.251 | 2.66E-03 | PRPF8    | pre-mRNA processing factor 8                                                                                              |
| -1.253 | 4.11E-02 | SON      | SON DNA binding protein                                                                                                   |
| -1.254 | 4.57E-02 | HNRNPL   | heterogeneous nuclear ribonucleoprotein L                                                                                 |
| -1.255 | 3.81E-02 | ACTL6A   | actin like 6A                                                                                                             |
| -1.259 | 1.25E-02 | PNP      | purine nucleoside phosphorylase                                                                                           |
| -1.261 | 2.54E-02 | SMC1A    | structural maintenance of chromosomes 1A                                                                                  |
| -1.262 | 2.45E-04 | Srsf5    | serine/arginine-rich splicing factor 5                                                                                    |
| -1.263 | 1.19E-02 | LMNB1    | lamin B1                                                                                                                  |
| -1.267 | 1.44E-02 | PSMC1    | proteasome 26S subunit, ATPase 1                                                                                          |
| -1.268 | 5.98E-03 | DDX17    | DEAD-box helicase 17                                                                                                      |
| -1.276 | 6.37E-04 | PSMB4    | proteasome subunit beta 4                                                                                                 |
| -1.282 | 4.93E-02 | HNRNPUL1 | heterogeneous nuclear ribonucleoprotein U-<br>like 1                                                                      |
| -1.282 | 2.19E-03 | CHD4     | chromodomain helicase DNA binding protein 4                                                                               |
| -1.289 | 3.33E-02 | TCERG1   | transcription elongation regulator 1                                                                                      |
| -1.307 | 6.30E-03 | Rbmx1l   | RNA binding motif protein, X-linked like-1<br>smu-1 suppressor of mec-8 and unc-52                                        |
| -1.312 | 8.88E-04 | SMU1     | homolog (C. elegans)<br>heterogeneous nuclear ribonucleoprotein C                                                         |
| -1.318 | 4.95E-02 | HNRNPC   | (C1/C2)                                                                                                                   |
| -1.325 | 8.97E-03 | KPNA3    | karyopherin alpha 3 (importin alpha 4)                                                                                    |
| -1.339 | 2.95E-02 | FKBP5    | FK506 binding protein 5                                                                                                   |
| -1.343 | 7.36E-03 | LBR      | lamin B receptor                                                                                                          |
| -1.355 | 4.57E-02 | HCFC1    | host cell factor C1                                                                                                       |
| -1.356 | 4.47E-02 | CBR1     | carbonyl reductase 1                                                                                                      |
| -1.357 | 4.80E-02 | NCBP1    | nuclear cap binding protein subunit 1<br>APEX nuclease (multifunctional DNA repair<br>enzyme) 1                           |
| -1.363 | 1.04E-02 | APEX1    | far upstream element (FUSE) binding protein                                                                               |
| -1.365 | 3.66E-03 | FUBP3    | 3                                                                                                                         |
| -1.381 | 2.50E-02 | GLO1     | glyoxalase I                                                                                                              |
| -1.385 | 6.07E-03 | TUBB     | tubulin beta class I<br>heterogeneous nuclear ribonucleoprotein L                                                         |
| -1.400 | 1.56E-03 | HNRNPLL  | like                                                                                                                      |
| -1.404 | 1.74E-02 | MTA2     | metastasis associated 1 family member 2                                                                                   |
| -1.405 | 1.33E-02 | ILF2     | interleukin enhancer binding factor 2                                                                                     |
| -1.405 | 2.76E-03 | MDH1     | malate dehydrogenase 1                                                                                                    |

|        |          |         |                                                                                                                                                    |
|--------|----------|---------|----------------------------------------------------------------------------------------------------------------------------------------------------|
| -1.419 | 6.97E-05 | Anp32a  | acidic (leucine-rich) nuclear phosphoprotein<br>32 family, member A                                                                                |
| -1.445 | 5.13E-03 | TMEM173 | transmembrane protein 173<br>heterogeneous nuclear ribonucleoprotein H2                                                                            |
| -1.450 | 4.62E-03 | HNRNPH2 | (H')                                                                                                                                               |
| -1.462 | 5.56E-04 | RUVBL1  | RuvB-like AAA ATPase 1                                                                                                                             |
| -1.467 | 1.89E-02 | PRPF40A | pre-mRNA processing factor 40 homolog A                                                                                                            |
| -1.476 | 1.67E-02 | SET     | SET nuclear proto-oncogene                                                                                                                         |
| -1.493 | 2.65E-02 | SUB1    | SUB1 homolog, transcriptional regulator<br>heterogeneous nuclear ribonucleoprotein H1                                                              |
| -1.494 | 6.68E-03 | HNRNPH1 | (H)<br>SWI/SNF related, matrix associated, actin<br>dependent regulator of chromatin, subfamily c,<br>member 2                                     |
| -1.589 | 5.50E-03 | SMARCC2 | ATPase, Na <sup>+</sup> /K <sup>+</sup> transporting, alpha 1                                                                                      |
| -1.599 | 4.06E-02 | ATP1A1  | polypeptide                                                                                                                                        |
| -1.632 | 2.73E-03 | HNRNPR  | heterogeneous nuclear ribonucleoprotein R                                                                                                          |
| -1.657 | 1.48E-02 | KPNA6   | karyopherin alpha 6 (importin alpha 7)<br>dihydrolipoamide branched chain transacylase<br>E2                                                       |
| -1.772 | 6.44E-03 | DBT     |                                                                                                                                                    |
| -1.792 | 1.52E-02 | GPD1L   | glycerol-3-phosphate dehydrogenase 1-like                                                                                                          |
| -1.853 | 3.16E-04 | DCPS    | decapping enzyme, scavenger<br>SEC13 homolog, nuclear pore and COPII coat<br>complex component                                                     |
| -1.877 | 8.13E-03 | SEC13   |                                                                                                                                                    |
| -1.905 | 6.61E-04 | CTSC    | cathepsin C                                                                                                                                        |
| -2.328 | 4.09E-02 | CRYZ    | crystallin zeta                                                                                                                                    |
| -2.608 | 4.04E-02 | THYN1   | thymocyte nuclear protein 1                                                                                                                        |
| -2.758 | 2.33E-02 | STK24   | serine/threonine kinase 24                                                                                                                         |
| -2.783 | 3.42E-02 | NUP153  | nucleoporin 153kDa                                                                                                                                 |
| -2.887 | 3.15E-02 | AGPS    | alkylglycerone phosphate synthase                                                                                                                  |
| -2.906 | 3.92E-02 | P2RY12  | purinergic receptor P2Y, G-protein coupled, 12                                                                                                     |
| -3.078 | 4.70E-03 | CUL5    | cullin 5<br>heterogeneous nuclear ribonucleoprotein H3<br>(2H9)                                                                                    |
| -3.084 | 4.12E-03 | HNRNPH3 |                                                                                                                                                    |
| -3.132 | 1.10E-02 | RRS1    | ribosome biogenesis regulator homolog                                                                                                              |
| -3.167 | 2.78E-02 | Snrpg   | small nuclear ribonucleoprotein polypeptide G                                                                                                      |
| -3.307 | 8.51E-03 | PRPF3   | pre-mRNA processing factor 3                                                                                                                       |
| -3.721 | 1.39E-02 | CBX5    | chromobox 5<br>cleavage stimulation factor, 3' pre-RNA,<br>subunit 2                                                                               |
| -3.802 | 3.99E-02 | CSTF2   |                                                                                                                                                    |
| -3.942 | 9.18E-03 | SMARCD2 | SWI/SNF related, matrix associated, actin<br>dependent regulator of chromatin, subfamily d,<br>member 2                                            |
| -4.205 | 3.23E-02 | TERF2IP | telomeric repeat binding factor 2, interacting<br>protein<br>heat shock protein family H (Hsp110) member<br>1                                      |
| -4.292 | 3.70E-02 | HSPH1   |                                                                                                                                                    |
| -4.359 | 2.64E-02 | RAB5B   | RAB5B, member RAS oncogene family                                                                                                                  |
| -4.438 | 4.51E-02 | FGD2    | FYVE, RhoGEF and PH domain containing 2<br>SWI/SNF related, matrix associated, actin<br>dependent regulator of chromatin, subfamily a,<br>member 4 |
| -4.449 | 1.85E-02 | SMARCA4 |                                                                                                                                                    |
| -4.699 | 1.15E-02 | CRYBA4  | crystallin beta A4                                                                                                                                 |
| -5.429 | 2.34E-02 | IPO9    | importin 9                                                                                                                                         |

|         |          |          |                                     |
|---------|----------|----------|-------------------------------------|
| -5.815  | 4.64E-02 | MAPK14   | mitogen-activated protein kinase 14 |
| -5.991  | 2.88E-05 | Hist1h1b | histone cluster 1, H1b              |
| -11.682 | 5.86E-05 | FRG1     | FSHD region gene 1                  |
